# Supplementary material for: Influenza vaccination and single cell multiomics reveal sex dimorphic immune imprints of prior mild COVID-19
Source: bioRxiv or medRxiv preprint supplement (doi:10.1101/2022.02.17.22271138), 2022-09-01
Supplement: Supplementary file [file media-1.pdf]

Extended Data Table 1. Cohort Characteristics

|                                                                    | COVR   |       | Healthy |      |
|--------------------------------------------------------------------|--------|-------|---------|------|
|                                                                    | Female | Male  | Female  | Male |
| <b>Subject count</b>                                               | 17     | 16    | 21      | 19   |
| <b>Age (Years)</b>                                                 |        |       |         |      |
| Median                                                             | 40.2   | 43.7  | 52.5    | 47.6 |
| Mean                                                               | 44.9   | 43.7  | 47.2    | 47.4 |
| Min                                                                | 23.4   | 21.9  | 22.5    | 24.0 |
| Max                                                                | 70.5   | 67.3  | 70.4    | 69.1 |
| <b>&gt; 65 years of age</b>                                        | 2      | 2     | 5       | 5    |
| <b>Race</b>                                                        |        |       |         |      |
| Asian                                                              | 1      | 0     | 2       | 2    |
| Black                                                              | 1      | 0     | 4       | 0    |
| Multiple race                                                      | 0      | 2     | 1       | 3    |
| White                                                              | 15     | 14    | 14      | 14   |
| <b>Experienced vaccine side effects</b>                            | 16     | 9     | 17      | 15   |
| <b>COVID-19 Symptoms</b>                                           |        |       |         |      |
| Asymptomatic                                                       | 1      | 1     | -       | -    |
| Symptomatic                                                        | 16     | 15    |         |      |
| <b>Time since COVID-19 Diagnosis (Days) *</b>                      |        |       |         |      |
| Median                                                             | 172.0  | 186.0 | -       | -    |
| Mean                                                               | 152.9  | 149.3 | -       | -    |
| Min                                                                | 58.0   | 44.0  | -       | -    |
| Max                                                                | 237.0  | 248.0 | -       | -    |
| <b>Experienced COVID-19 residual symptoms at time of screening</b> | 8      | 3     | -       | -    |
| <b>COVID-19 Residual Symptoms</b>                                  |        |       |         |      |
| Brain fog                                                          | 1      | 0     | -       | -    |
| Fatigue                                                            | 2      | 0     | -       | -    |
| Loose stools                                                       | 0      | 1     | -       | -    |
| Reduced sense of taste                                             | 1      | 1     | -       | -    |
| Reduced sense of smell /<br>smell disturbances                     | 5      | 2     | -       | -    |
| Shortness of breath /<br>Chest pressure                            | 1      | 0     | -       | -    |

\* Excluding asymptomatic subjects
